# Supplementary material for: Effect of the Size and Shape of Dendronized Iron Oxide Nanoparticles Bearing a Targeting Ligand on MRI, Magnetic Hyperthermia, and Photothermia Properties—From Suspension to In Vitro Studies
Source: MDPI journal article supplement (doi:10.3390/pharmaceutics15041104), 2023-03-30
Supplement: s1 [file s1]

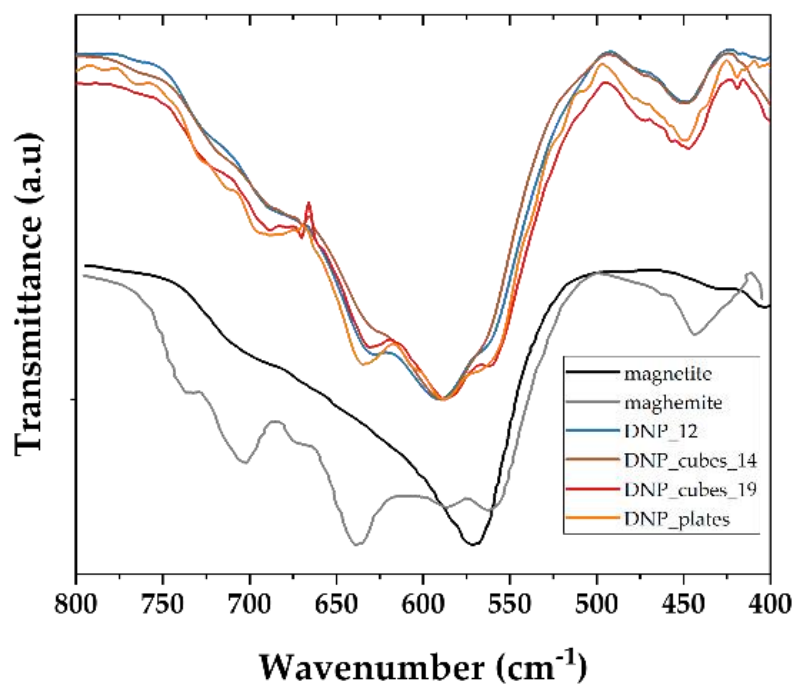

**Figure S1.** FT IR spectra of DNP\_12, DNP\_cubes\_14, DNP\_cubes\_19 and DNP plates in the region 800 – 400  $\text{cm}^{-1}$  corresponding the Fe-O band compared to spectra of magnetite and maghemite.

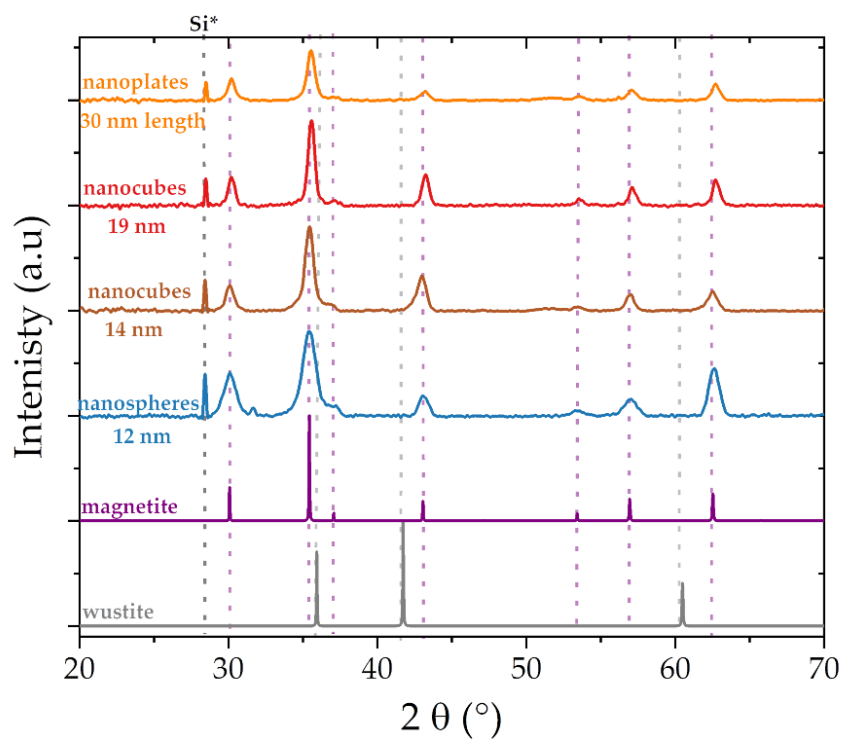

**Figure S2.** X-ray diffractograms of DNP\_12, DNP\_cubes\_14, DNP\_cubes\_19 and DNP plates compared to theoretical diffractograms of magnetite and wustite.

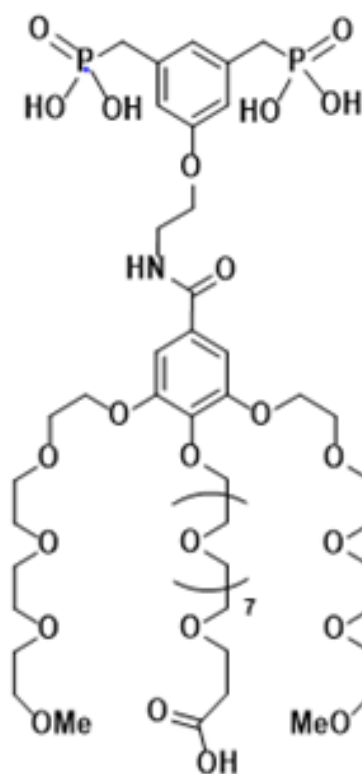

**Figure S3.** Chemical structure of the dendron molecule D1-2P used to obtain stable colloidal suspensions of NPs in water.

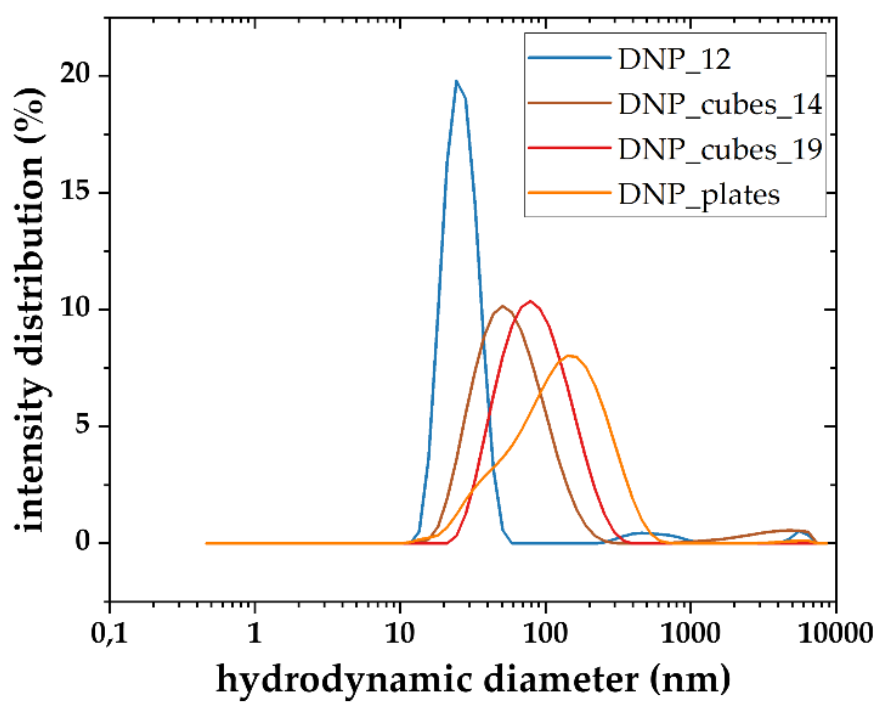

**Figure S4.** Hydrodynamic size distribution in intensity mode measured by DLS for all DNPs.

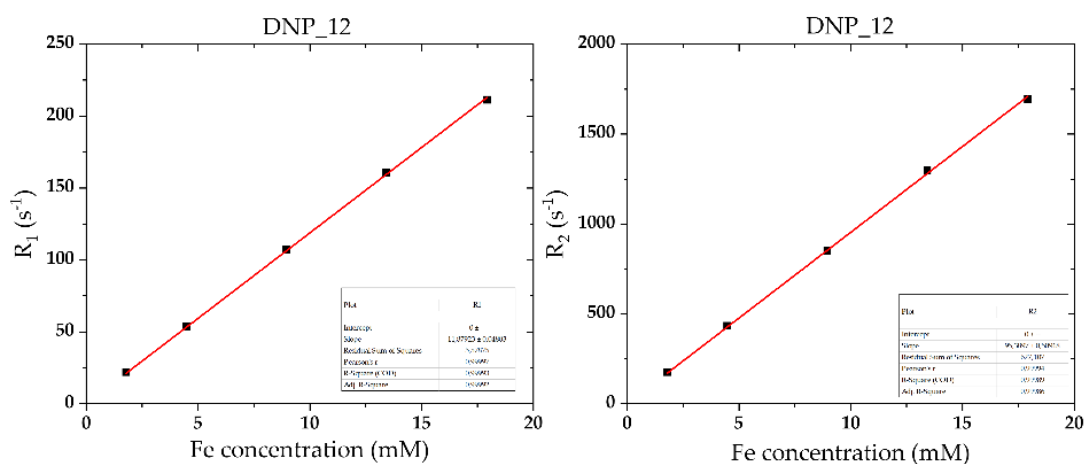

**Figure S5.** Relaxation rates  $R_1$  (left) and  $R_2$  (right) in the function of iron concentration for the DNP\_12 suspension. A linear fit was made to assess the transversal and longitudinal relaxivities (respectively  $r_1$  and  $r_2$ ). The same procedure was applied for all the DNPs.

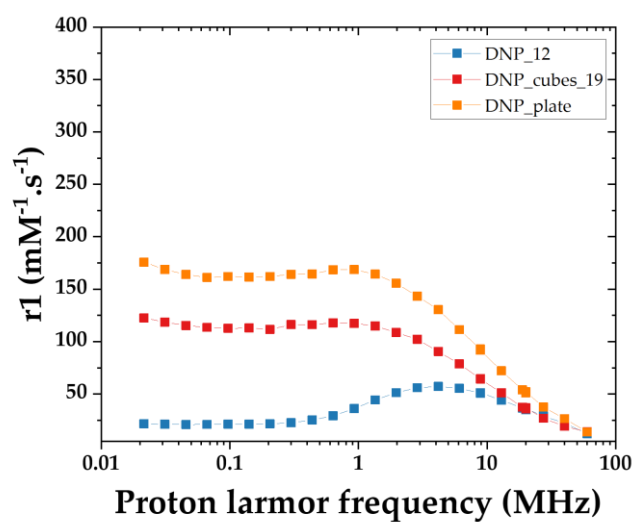

**Figure S6.** NMRD profiles of different DNPs.

**Table S1.** Extracted  $M_s$  values and NMRD radii after fitting of NMRD curves.

| Batch        | $M_s$ (from SQUID data)<br>(emu/g) | $M_s$ (from NMRD)<br>(emu/g) | NMRD radius<br>(nm) |
|--------------|------------------------------------|------------------------------|---------------------|
| DNP_12       | 56                                 | 48                           | 7.2                 |
| DNP_cubes_19 | 85                                 | 46.3                         | 9.3                 |
| DNP_plates   | 57                                 | 53.3                         | 10.1                |
